# Supplementary material for: Transcriptome Analysis of Oleoresin-Producing Tree Sindora Glabra and Characterization of Sesquiterpene Synthases
Source: Front Plant Sci. 2018 Nov 20;9:1619. doi: 10.3389/fpls.2018.01619 (PMC6256070; doi:10.3389/fpls.2018.01619)
Supplement: File S1 — Details of species classification of all annotated unigenes. [file Table_1.XLSX]

## Sheet: Sheet1
Species	UniGene number	percentage (%)
Glycine max	37677	17.5509
Glycine soja	32460	15.1207
Cicer arietinum	21845	10.1759
Phaseolus vulgaris	19255	8.96946
Medicago truncatula	16931	7.88688
Vitis vinifera	10871	5.06398
Theobroma cacao	6770	3.15363
Jatropha curcas	4501	2.09668
Prunus mume	3772	1.75709
Prunus persica	3626	1.68908
Gossypium raimondii	3477	1.61967
Citrus sinensis	3460	1.61175
Lotus japonicus	3251	1.5144
Ricinus communis	2797	1.30291
Populus trichocarpa	2548	1.18692
Eucalyptus grandis	2508	1.16829
Pyrus x	2362	1.10028
Malus domestica	2276	1.06022
Populus euphratica	2204	1.02668
Nelumbo nucifera	2089	0.973108
Citrus clementina	1597	0.743922
Fragaria vesca	1585	0.738332
Cucumis sativus	1456	0.678241
Cucumis melo	1406	0.65495
Sesamum indicum	1085	0.50542
Nicotiana sylvestris	1072	0.499364
Gossypium arboreum	1052	0.490048
Beta vulgaris	991	0.461632
Tarenaya hassleriana	901	0.419708
Coffea canephora	832	0.387566
Elaeis guineensis	795	0.370331
Solanum demissum	736	0.342847
Hordeum vulgare	672	0.313034
Nicotiana tomentosiformis	665	0.309773
Arachis hypogaea	595	0.277166
Phoenix dactylifera	585	0.272507
Solanum tuberosum	582	0.27111
Musa acuminata	423	0.197044
Zea mays	409	0.190522
Brassica napus	408	0.190057
Solanum lycopersicum	392	0.182603
Arabidopsis thaliana	372	0.173287
Erythranthe guttata	354	0.164902
Camelina sativa	349	0.162573
Aegilops tauschii	277	0.129033
Amborella trichopoda	257	0.119717
Oryza sativa	244	0.113661
Coccomyxa subellipsoidea	242	0.11273
Guillardia theta	238	0.110866
Physcomitrella patens	238	0.110866
Galdieria sulphuraria	224	0.104345
Brassica rapa	217	0.101084
Eutrema salsugineum	207	0.0964257
Triticum urartu	196	0.0913017
Genlisea aurea	193	0.0899042
Emiliania huxleyi	188	0.0875751
Malus x	178	0.0829168
Selaginella moellendorffii	170	0.0791902
Pisum sativum	164	0.0763953
Capsella rubella	156	0.0726687
Arabidopsis lyrata	148	0.0689421
Volvox carteri	139	0.0647496
Sorghum bicolor	128	0.0596256
Vitis hybrid	124	0.0577623
Ectocarpus siliculosus	123	0.0572964
Setaria italica	123	0.0572964
Phytophthora sojae	122	0.0568306
Arabis alpina	114	0.053104
Hevea brasiliensis	113	0.0526382
Oryza brachyantha	111	0.0517065
Picea sitchensis	111	0.0517065
Chlamydomonas reinhardtii	110	0.0512407
Saprolegnia parasitica	108	0.0503091
Chlorella variabilis	105	0.0489116
Tamarindus indica	104	0.0484458
Phytophthora parasitica	101	0.0470483
Chondrus crispus	100	0.0465825
Acacia mangium	96	0.0447192
Nicotiana tabacum	96	0.0447192
Monoraphidium neglectum	94	0.0437875
Brachypodium distachyon	93	0.0433217
Aphanomyces invadans	92	0.0428559
Copaifera officinalis	90	0.0419242
Oryza sativa	90	0.0419242
Aphanomyces astaci	85	0.0395951
Vigna unguiculata	85	0.0395951
Auxenochlorella protothecoides	82	0.0381976
Saprolegnia diclina	81	0.0377318
Micromonas sp.	76	0.0354027
Aureococcus anophagefferens	73	0.0340052
Camellia sinensis	72	0.0335394
Gossypium hirsutum	72	0.0335394
Cyanidioschyzon merolae	70	0.0326077
Lupinus angustifolius	66	0.0307444
Albugo laibachii	64	0.0298128
Phytophthora infestans	60	0.0279495
Sesbania rostrata	59	0.0274837
Caragana korshinskii	57	0.026552
Trifolium pratense	57	0.026552
Glycyrrhiza uralensis	55	0.0256204
Blastocystis hominis	54	0.0251545
Micromonas pusilla	51	0.0237571
Phaeodactylum tricornutum	51	0.0237571
Thalassiosira pseudonana	50	0.0232912
Betula platyphylla	49	0.0228254
Cercis chinensis	49	0.0228254
Ostreococcus lucimarinus	45	0.0209621
Ostreococcus tauri	44	0.0204963
Albugo candida	42	0.0195646
Thalassiosira oceanica	41	0.0190988
Phytophthora parasitica	40	0.018633
Lupinus albus	39	0.0181672
Bathycoccus prasinos	38	0.0177013
Cucumis melo	38	0.0177013
Triticum aestivum	37	0.0172355
Ammopiptanthus mongolicus	32	0.0149064
Betula luminifera	32	0.0149064
Phytophthora parasitica	31	0.0144406
Lupinus luteus	30	0.0139747
Plutella xylostella	30	0.0139747
Vigna radiata	29	0.0135089
Copaifera langsdorffii	28	0.0130431
Dahlia pinnata	28	0.0130431
Glycyrrhiza glabra	26	0.0121114
Litchi chinensis	26	0.0121114
Trifolium repens	26	0.0121114
Leucaena leucocephala	25	0.0116456
Phytophthora parasitica	25	0.0116456
Populus trichocarpa	25	0.0116456
Vicia faba	24	0.0111798
Cyanophora paradoxa	23	0.010714
Dimocarpus longan	23	0.010714
Helicosporidium sp.	23	0.010714
Medicago sativa	23	0.010714
Pueraria montana	23	0.010714
Asparagus officinalis	21	0.00978232
Morella rubra	21	0.00978232
Robinia pseudoacacia	21	0.00978232
Senna obtusifolia	21	0.00978232
Amorpha fruticosa	20	0.0093165
Ipomoea trifida	20	0.0093165
Pyropia yezoensis	20	0.0093165
Salvia miltiorrhiza	20	0.0093165
Arachis duranensis	19	0.00885067
Codiaeum variegatum	18	0.00838485
Ipomoea batatas	18	0.00838485
Nannochloropsis gaditana	18	0.00838485
Passiflora edulis	18	0.00838485
Phyllostachys edulis	18	0.00838485
Phytophthora parasitica	18	0.00838485
Astragalus membranaceus	17	0.00791902
Cyamopsis tetragonoloba	17	0.00791902
Olea europaea	17	0.00791902
Vigna angularis	17	0.00791902
Euphorbia esula	16	0.0074532
Ammopiptanthus nanus	15	0.00698737
Carica papaya	15	0.00698737
Fagus sylvatica	15	0.00698737
Hordeum vulgare	15	0.00698737
Lingulodinium polyedrum	15	0.00698737
Boehmeria nivea	14	0.00652155
Conocephalum conicum	14	0.00652155
Fusarium verticillioides	14	0.00652155
Kalanchoe fedtschenkoi	14	0.00652155
Mimosa pudica	14	0.00652155
Ananas comosus	13	0.00605572
Hydnora visseri	13	0.00605572
Manihot esculenta	13	0.00605572
Phytophthora parasitica	13	0.00605572
Rhodomonas sp.	13	0.00605572
Acetabularia acetabulum	12	0.0055899
Actinidia chinensis	12	0.0055899
Arachis diogoi	12	0.0055899
Guillardia theta	12	0.0055899
Malus baccata	12	0.0055899
Populus tremula	12	0.0055899
Rosa chinensis	12	0.0055899
Vernicia fordii	12	0.0055899
Ziziphus jujuba	12	0.0055899
Camptotheca acuminata	11	0.00512407
Capsicum annuum	11	0.00512407
Juglans regia	11	0.00512407
Lactuca sativa	11	0.00512407
Populus tomentosa	11	0.00512407
Populus x	11	0.00512407
Ribes nigrum	11	0.00512407
Wolffia australiana	11	0.00512407
Chlorella vulgaris	10	0.00465825
Corylus avellana	10	0.00465825
Euglena gracilis	10	0.00465825
Gracilariopsis lemaneiformis	10	0.00465825
Penicillium oxalicum	10	0.00465825
Rosa rugosa	10	0.00465825
Spinacia oleracea	10	0.00465825
Stylosanthes guianensis	10	0.00465825
Actinidia deliciosa	9	0.00419242
Antirrhinum majus	9	0.00419242
Carya cathayensis	9	0.00419242
Casuarina glauca	9	0.00419242
Chlorella sp.	9	0.00419242
Citrullus lanatus	9	0.00419242
Clitoria ternatea	9	0.00419242
Dunaliella salina	9	0.00419242
Gossypium barbadense	9	0.00419242
Humulus lupulus	9	0.00419242
Millettia pinnata	9	0.00419242
Nicotiana benthamiana	9	0.00419242
Nicotiana langsdorffii	9	0.00419242
Pelargonium x	9	0.00419242
Prunus avium	9	0.00419242
Quercus ilex	9	0.00419242
Zostera marina	9	0.00419242
Chlorella pyrenoidosa	8	0.0037266
Dipteryx panamensis	8	0.0037266
Fragaria x	8	0.0037266
Garcinia mangostana	8	0.0037266
Glycyrrhiza echinata	8	0.0037266
Hypseocharis bilobata	8	0.0037266
Medicago sativa	8	0.0037266
Ophiocordyceps sinensis	8	0.0037266
Primula vulgaris	8	0.0037266
Pyrus pyrifolia	8	0.0037266
Vigna radiata	8	0.0037266
Vitis bellula	8	0.0037266
Achlya hypogyna	7	0.00326077
Aquilaria sinensis	7	0.00326077
Artemisia annua	7	0.00326077
Cajanus cajan	7	0.00326077
Chlamydomonas incerta	7	0.00326077
Citrus trifoliata	7	0.00326077
Dieffenbachia seguine	7	0.00326077
Flaveria trinervia	7	0.00326077
Francoa sonchifolia	7	0.00326077
Helianthus annuus	7	0.00326077
Lemna gibba	7	0.00326077
Mangifera indica	7	0.00326077
Pelargonium australe	7	0.00326077
Petunia x	7	0.00326077
Pfiesteria piscicida	7	0.00326077
Pierreodendron africanum	7	0.00326077
Prunus salicina	7	0.00326077
Thraustotheca clavata	7	0.00326077
Vicia faba	7	0.00326077
Aureobasidium subglaciale	6	0.00279495
Camellia nitidissima	6	0.00279495
Epimedium sagittatum	6	0.00279495
Fragaria vesca	6	0.00279495
Galega orientalis	6	0.00279495
Hyacinthus orientalis	6	0.00279495
Mesembryanthemum crystallinum	6	0.00279495
Panax ginseng	6	0.00279495
Portulaca oleracea	6	0.00279495
Rosa multiflora	6	0.00279495
Symphyocladia latiuscula	6	0.00279495
Vigna mungo	6	0.00279495
Vitis riparia	6	0.00279495
Betula pendula	5	0.00232912
Brassica juncea	5	0.00232912
Camellia chekiangoleosa	5	0.00232912
Cannabis sativa	5	0.00232912
Ceratonia siliqua	5	0.00232912
Chlamydomonas sp.	5	0.00232912
Corylus heterophylla	5	0.00232912
Daucus carota	5	0.00232912
Diospyros kaki	5	0.00232912
Entransia fimbriata	5	0.00232912
Eragrostis tef	5	0.00232912
Griffithsia japonica	5	0.00232912
Hildenbrandia rubra	5	0.00232912
Karlodinium veneficum	5	0.00232912
Lemna paucicostata	5	0.00232912
Marchantia polymorpha	5	0.00232912
Musa acuminata	5	0.00232912
Nicotiana attenuata	5	0.00232912
Pelargonium dichondrifolium	5	0.00232912
Pinus koraiensis	5	0.00232912
Pinus massoniana	5	0.00232912
Populus pruinosa	5	0.00232912
Rhodomonas salina	5	0.00232912
Samanea saman	5	0.00232912
Secale cereale	5	0.00232912
Sophora viciifolia	5	0.00232912
Stellaria longipes	5	0.00232912
Triteleia hyacinthina	5	0.00232912
Wolffia arrhiza	5	0.00232912
Actinophrys sol	4	0.0018633
Aextoxicon punctatum	4	0.0018633
Alisma plantago-aquatica	4	0.0018633
Arabidopsis halleri	4	0.0018633
Arachis hypogaea	4	0.0018633
Beta vulgaris	4	0.0018633
Brassica rapa	4	0.0018633
Bruguiera gymnorhiza	4	0.0018633
Bryonia dioica	4	0.0018633
Canavalia gladiata	4	0.0018633
Castanea sativa	4	0.0018633
Catharanthus roseus	4	0.0018633
Chrysanthemum boreale	4	0.0018633
Cichorium intybus	4	0.0018633
Citrus x	4	0.0018633
Cleome spinosa	4	0.0018633
Coffea arabica	4	0.0018633
Dunaliella parva	4	0.0018633
Gossypium barbadense	4	0.0018633
Hedera nepalensis	4	0.0018633
Hematodinium sp.	4	0.0018633
Linum usitatissimum	4	0.0018633
Melianthus villosus	4	0.0018633
Morus alba	4	0.0018633
Myrciaria dubia	4	0.0018633
Oryza australiensis	4	0.0018633
Pavlova lutheri	4	0.0018633
Pediastrum duplex	4	0.0018633
Picrorhiza kurrooa	4	0.0018633
Posidonia oceanica	4	0.0018633
Pteris vittata	4	0.0018633
Retama raetam	4	0.0018633
Sesbania drummondii	4	0.0018633
Solanum bulbocastanum	4	0.0018633
Sophora moorcroftiana	4	0.0018633
Spirodela polyrhiza	4	0.0018633
Thellungiella halophila	4	0.0018633
Vaccinium macrocarpon	4	0.0018633
Zoysia matrella	4	0.0018633
Actinidia arguta	3	0.00139747
Arabidopsis cebennensis	3	0.00139747
Arabidopsis halleri	3	0.00139747
Asparagopsis taxiformis	3	0.00139747
Batis maritima	3	0.00139747
Boechera divaricarpa	3	0.00139747
Canarium album	3	0.00139747
Canavalia lineata	3	0.00139747
Caragana jubata	3	0.00139747
Chlamydomonas sp.	3	0.00139747
Chlorella sp.	3	0.00139747
Chlorokybus atmophyticus	3	0.00139747
Citrus maxima	3	0.00139747
Citrus suavissima	3	0.00139747
Coccomyxa sp.	3	0.00139747
Cryptomonas paramecium	3	0.00139747
Cycas revoluta	3	0.00139747
Dendrobium catenatum	3	0.00139747
Eucalyptus camaldulensis	3	0.00139747
Eucalyptus cladocalyx	3	0.00139747
Eucommia ulmoides	3	0.00139747
Eustoma exaltatum	3	0.00139747
Fusarium fujikuroi	3	0.00139747
Fusarium oxysporum	3	0.00139747
Gardenia jasminoides	3	0.00139747
Geranium maderense	3	0.00139747
Haematoxylum brasiletto	3	0.00139747
Hematodinium sp.	3	0.00139747
Hiptage benghalensis	3	0.00139747
Hordeum vulgare	3	0.00139747
Humulus scandens	3	0.00139747
Ipomoea nil	3	0.00139747
Lens culinaris	3	0.00139747
Lithospermum erythrorhizon	3	0.00139747
Lobosphaera incisa	3	0.00139747
Malus hupehensis	3	0.00139747
Marchantia paleacea	3	0.00139747
Mikania micrantha	3	0.00139747
Miscanthus sinensis	3	0.00139747
Monsonia marlothii	3	0.00139747
Phytophthora nicotianae	3	0.00139747
Pinus taeda	3	0.00139747
Plocamium cartilagineum	3	0.00139747
Prunus dulcis	3	0.00139747
Pterostemon rotundifolius	3	0.00139747
Pyramimonas cordata	3	0.00139747
Pyrocystis lunula	3	0.00139747
Pyropia haitanensis	3	0.00139747
Quercus robur	3	0.00139747
Quercus suber	3	0.00139747
Quillaja saponaria	3	0.00139747
Schimmelmannia schousboei	3	0.00139747
Securigera parviflora	3	0.00139747
Senna occidentalis	3	0.00139747
Senna tora	3	0.00139747
Solanum peruvianum	3	0.00139747
Stylosanthes hamata	3	0.00139747
Tecoma stans	3	0.00139747
Tetraselmis sp.	3	0.00139747
Trachelium caeruleum	3	0.00139747
Zantedeschia aethiopica	3	0.00139747
Acacia koa	2	0.00093165
Apios americana	2	0.00093165
Aspergillus niger	2	0.00093165
Astragalus sinicus	2	0.00093165
Atriplex spongiosa	2	0.00093165
Aulacantha scolymantha	2	0.00093165
Aureobasidium pullulans	2	0.00093165
Azadirachta indica	2	0.00093165
Beta vulgaris	2	0.00093165
Bidens laevis	2	0.00093165
Brachypodium phoenicoides	2	0.00093165
Bursera hindsiana	2	0.00093165
California macrophylla	2	0.00093165
Camellia oleifera	2	0.00093165
Castanea mollissima	2	0.00093165
Ceramium japonicum	2	0.00093165
Ceratophyllum platyacanthum	2	0.00093165
Chimonanthus praecox	2	0.00093165
Cinchona calisaya	2	0.00093165
Citrus aurantiifolia	2	0.00093165
Colocasia esculenta	2	0.00093165
Cornus kousa	2	0.00093165
Crypthecodinium cohnii	2	0.00093165
Cucumis melo	2	0.00093165
Cyclocarya paliurus	2	0.00093165
Datisca glomerata	2	0.00093165
Durio zibethinus	2	0.00093165
Eleutherococcus senticosus	2	0.00093165
Emiliania huxleyi	2	0.00093165
Epipremnum aureum	2	0.00093165
Erodium foetidum	2	0.00093165
Erodium gruinum	2	0.00093165
Eucalyptus grandis	2	0.00093165
Eucheuma denticulatum	2	0.00093165
Fusarium oxysporum	2	0.00093165
Galearia maingayi	2	0.00093165
Glaucocystis nostochinearum	2	0.00093165
Goniomonas truncata	2	0.00093165
Grateloupia taiwanensis	2	0.00093165
Gynostemma pentaphyllum	2	0.00093165
Haplomitrium mnioides	2	0.00093165
Homo sapiens	2	0.00093165
Illicium henryi	2	0.00093165
Indigofera tinctoria	2	0.00093165
Ipomoea tricolor	2	0.00093165
Iseia luxurians	2	0.00093165
Juglans nigra	2	0.00093165
Klebsormidium flaccidum	2	0.00093165
Lilium lancifolium	2	0.00093165
Lilium longiflorum	2	0.00093165
Lotus tenuis	2	0.00093165
Malus prunifolia	2	0.00093165
Marsilea quadrifolia	2	0.00093165
Monomastix sp.	2	0.00093165
Musa acuminata	2	0.00093165
Musa balbisiana	2	0.00093165
Nannochloropsis gaditana	2	0.00093165
Narcissus tazetta	2	0.00093165
Nephroselmis olivacea	2	0.00093165
Nicotiana plumbaginifolia	2	0.00093165
Nicotiana rustica	2	0.00093165
Onobrychis viciifolia	2	0.00093165
Ornithogalum longebracteatum	2	0.00093165
Oxybasis rubra	2	0.00093165
Paphiopedilum armeniacum	2	0.00093165
Parkia platycephala	2	0.00093165
Peridiscus lucidus	2	0.00093165
Petunia integrifolia	2	0.00093165
Phalaenopsis aphrodite	2	0.00093165
Phalaenopsis hybrid	2	0.00093165
Plumbago auriculata	2	0.00093165
Polytomella sp.	2	0.00093165
Populus nigra	2	0.00093165
Populus tremula	2	0.00093165
Prunus pseudocerasus	2	0.00093165
Pseudendoclonium akinetum	2	0.00093165
Psilotum nudum	2	0.00093165
Pulsatilla pratensis	2	0.00093165
Pyrus betulifolia	2	0.00093165
Quercus glauca	2	0.00093165
Raphanus sativus	2	0.00093165
Rhazya stricta	2	0.00093165
Rubus idaeus	2	0.00093165
Sandersonia aurantiaca	2	0.00093165
Selaginella lepidophylla	2	0.00093165
Senna alata	2	0.00093165
Solanum chacoense	2	0.00093165
Solanum chilense	2	0.00093165
Solanum lycopersicum	2	0.00093165
Sonneratia caseolaris	2	0.00093165
Sophora davidii	2	0.00093165
Stylosanthes humilis	2	0.00093165
Tectona grandis	2	0.00093165
Torenia hybrid	2	0.00093165
Trebouxia aggregata	2	0.00093165
Trifolium occidentale	2	0.00093165
Triosteum himalayanum	2	0.00093165
Triticum monococcum	2	0.00093165
Typha angustifolia	2	0.00093165
Vitis aestivalis	2	0.00093165
Vitis cinerea	2	0.00093165
Zanthoxylum ailanthoides	2	0.00093165
Zinnia violacea	2	0.00093165
'Chlorella' fusca	1	0.000465825
Acacia confusa	1	0.000465825
Acacia ligulata	1	0.000465825
Achnanthes kuwaitensis	1	0.000465825
Acorus americanus	1	0.000465825
Actinidia deliciosa	1	0.000465825
Actinidia eriantha	1	0.000465825
Actinidia latifolia	1	0.000465825
Adonis aestivalis	1	0.000465825
Aegiceras corniculatum	1	0.000465825
Aegilops kotschyi	1	0.000465825
Aeschynomene sp.	1	0.000465825
Aethionema cordifolium	1	0.000465825
Ageratina adenophora	1	0.000465825
Aglaothamnion neglectum	1	0.000465825
Agrostemma githago	1	0.000465825
Allium cepa	1	0.000465825
Aloe arborescens	1	0.000465825
Alternanthera philoxeroides	1	0.000465825
Amorpha confusa	1	0.000465825
Amphicarpaea bracteata	1	0.000465825
Angelica sinensis	1	0.000465825
Annona cherimola	1	0.000465825
Anthoxanthum nitens	1	0.000465825
Aphyllanthes monspeliensis	1	0.000465825
Apium graveolens	1	0.000465825
Apocynum venetum	1	0.000465825
Aquilegia coerulea	1	0.000465825
Arachis ipaensis	1	0.000465825
Ardisia polysticta	1	0.000465825
Asclepias syriaca	1	0.000465825
Ascophyllum nodosum	1	0.000465825
Aster spathulifolius	1	0.000465825
Asterochloris sp.	1	0.000465825
Astragalus bisulcatus	1	0.000465825
Astragalus chrysochlorus	1	0.000465825
Astragalus racemosus	1	0.000465825
Atriplex canescens	1	0.000465825
Aucuba japonica	1	0.000465825
Avena fatua	1	0.000465825
Bangia fuscopurpurea	1	0.000465825
Barbula unguiculata	1	0.000465825
Baskervilla colombiana	1	0.000465825
Betaphycus philippinensis	1	0.000465825
Boechera laevigata	1	0.000465825
Boechera stricta	1	0.000465825
Brassica juncea	1	0.000465825
Brassica oleracea	1	0.000465825
Brassica oleracea	1	0.000465825
Brassica oleracea	1	0.000465825
Brassica rapa	1	0.000465825
Brunellia acutangula	1	0.000465825
Bupleurum chinense	1	0.000465825
Buxbaumia aphylla	1	0.000465825
Cadia purpurea	1	0.000465825
Calanthe triplicata	1	0.000465825
Calliarthron tuberculosum	1	0.000465825
Camellia sinensis	1	0.000465825
Canavalia ensiformis	1	0.000465825
Canella winterana	1	0.000465825
Canna indica	1	0.000465825
Castanopsis chinensis	1	0.000465825
Cattleya crispata	1	0.000465825
Cedrela odorata	1	0.000465825
Cedrus deodara	1	0.000465825
Cercis canadensis	1	0.000465825
Chara corallina	1	0.000465825
Chlamydomonas moewusii	1	0.000465825
Chlamydomonas raudensis	1	0.000465825
Chloranthus fortunei	1	0.000465825
Chlorella sorokiniana	1	0.000465825
Chloromonas brevispina	1	0.000465825
Chromochloris zofingiensis	1	0.000465825
Chroomonas mesostigmatica	1	0.000465825
Chroomonas mesostigmatica	1	0.000465825
Chrysodidymus synuroideus	1	0.000465825
Citrullus lanatus	1	0.000465825
Citrus tamurana	1	0.000465825
Citrus unshiu	1	0.000465825
Cladophora rupestris	1	0.000465825
Clutia sp.	1	0.000465825
Coccotylus truncatus	1	0.000465825
Coffea arabica	1	0.000465825
Coleochaete scutata	1	0.000465825
Coptis laciniata	1	0.000465825
Corchorus olitorius	1	0.000465825
Cornus florida	1	0.000465825
Craterostigma plantagineum	1	0.000465825
Crotalaria juncea	1	0.000465825
Croton stellatopilosus	1	0.000465825
Cryptomeria japonica	1	0.000465825
Cucurbita cv.	1	0.000465825
Cucurbita maxima	1	0.000465825
Cucurbita pepo	1	0.000465825
Cuphea lanceolata	1	0.000465825
Cupressus sempervirens	1	0.000465825
Curatella americana	1	0.000465825
Cyanidiaceae sp.	1	0.000465825
Cyanoptyche gloeocystis	1	0.000465825
Cymbidium faberi	1	0.000465825
Dactylis glomerata	1	0.000465825
Daphniphyllum sp.	1	0.000465825
Datura stramonium	1	0.000465825
Dendrobium crumenatum	1	0.000465825
Descurainia sophia	1	0.000465825
Desmarestia viridis	1	0.000465825
Detarium macrocarpum	1	0.000465825
Dionaea muscipula	1	0.000465825
Dysosma aurantiocaulis	1	0.000465825
Egeria densa	1	0.000465825
Eleocharis macrostachya	1	0.000465825
Elymus mutabilis	1	0.000465825
Eperua falcata	1	0.000465825
Eperua grandiflora	1	0.000465825
Equisetum arvense	1	0.000465825
Eriobotrya japonica	1	0.000465825
Erodium texanum	1	0.000465825
Erodium trifolium	1	0.000465825
Eucalyptus globulus	1	0.000465825
Eucalyptus gunnii	1	0.000465825
Euphorbia peplus	1	0.000465825
Fagus crenata	1	0.000465825
Festuca altissima	1	0.000465825
Festuca arundinacea	1	0.000465825
Flaveria pringlei	1	0.000465825
Fragaria x	1	0.000465825
Fritillaria agrestis	1	0.000465825
Fuchsia hybrid	1	0.000465825
Geranium traversii	1	0.000465825
Gerbera hybrid	1	0.000465825
Goniomonas sp.	1	0.000465825
Gossypium barbadense	1	0.000465825
Gossypium darwinii	1	0.000465825
Gossypium longicalyx	1	0.000465825
Gossypium turneri	1	0.000465825
Goupia glabra	1	0.000465825
Grimmia pilifera	1	0.000465825
Haematococcus pluvialis	1	0.000465825
Helianthus annuus	1	0.000465825
Helianthus argophyllus	1	0.000465825
Helianthus maximiliani	1	0.000465825
Helianthus salicifolius	1	0.000465825
Helicosporidium sp.	1	0.000465825
Heterochlorella luteoviridis	1	0.000465825
Heterosigma akashiwo	1	0.000465825
Hibiscus cannabinus	1	0.000465825
Hirschfeldia incana	1	0.000465825
Hordeum jubatum	1	0.000465825
Hymenostegia laxiflora	1	0.000465825
Hypericum perforatum	1	0.000465825
Illicium parviflorum	1	0.000465825
Isochrysis galbana	1	0.000465825
Jacaranda mimosifolia	1	0.000465825
Kirengeshoma palmata	1	0.000465825
Kosteletzkya virginica	1	0.000465825
Kummerowia stipulacea	1	0.000465825
Lagerstroemia indica	1	0.000465825
Lathyrus sativus	1	0.000465825
Leptolegnia chapmanii	1	0.000465825
Leucocryptos marina	1	0.000465825
Leymus paboanus	1	0.000465825
Libidibia coriaria	1	0.000465825
Licania alba	1	0.000465825
Lonicera macranthoides	1	0.000465825
Lotus corniculatus	1	0.000465825
Lysimachia coreana	1	0.000465825
Magnolia denudata	1	0.000465825
Malus hybrid	1	0.000465825
Malus micromalus	1	0.000465825
Mammillaria winterae	1	0.000465825
Marsupiomonas sp.	1	0.000465825
Medicago falcata	1	0.000465825
Medicago truncatula	1	0.000465825
Metroxylon sagu	1	0.000465825
Microlaena stipoides	1	0.000465825
Microspora stagnorum	1	0.000465825
Mitragyna speciosa	1	0.000465825
Monsonia emarginata	1	0.000465825
Morus alba	1	0.000465825
Morus alba	1	0.000465825
Morus indica	1	0.000465825
Morus notabilis	1	0.000465825
Musa AB	1	0.000465825
Nandina domestica	1	0.000465825
Nannochloropsis sp.	1	0.000465825
Neyraudia reynaudiana	1	0.000465825
Nicotiana alata	1	0.000465825
Nicotiana glutinosa	1	0.000465825
Nicotiana tabacum/Hyoscyamus	1	0.000465825
Noccaea caerulescens	1	0.000465825
Ochna mossambicensis	1	0.000465825
Ochromonas danica	1	0.000465825
Ocimum basilicum	1	0.000465825
Oenothera berteroana	1	0.000465825
Oncidium hybrid	1	0.000465825
Opalina sp.	1	0.000465825
Ophioglossum pedunculosum	1	0.000465825
Oryza coarctata	1	0.000465825
Oryza rufipogon	1	0.000465825
Oryza sativa	1	0.000465825
Oxalis latifolia	1	0.000465825
Oxybasis glauca	1	0.000465825
Paeonia suffruticosa	1	0.000465825
Panax notoginseng	1	0.000465825
Papaver pseudo-orientale	1	0.000465825
Paphiopedilum niveum	1	0.000465825
Paracryphia alticola	1	0.000465825
Paulinella chromatophora	1	0.000465825
Pelargonium alternans	1	0.000465825
Pelargonium citronellum	1	0.000465825
Pelargonium transvaalense	1	0.000465825
Pellia endiviifolia	1	0.000465825
Pentactina rupicola	1	0.000465825
Perilla frutescens	1	0.000465825
Phaseolus acutifolius	1	0.000465825
Phaseolus coccineus	1	0.000465825
Phoradendron serotinum	1	0.000465825
Physalis peruviana	1	0.000465825
Physcomitrella magdalenae	1	0.000465825
Phytolacca acinosa	1	0.000465825
Phytophthora capsici	1	0.000465825
Phytophthora infestans	1	0.000465825
Phytophthora ipomoeae	1	0.000465825
Phytophthora polonica	1	0.000465825
Picea abies	1	0.000465825
Picea mariana	1	0.000465825
Picea wilsonii	1	0.000465825
Pilostyles aethiopica	1	0.000465825
Pinellia ternata	1	0.000465825
Pinus pinaster	1	0.000465825
Pinus sylvestris	1	0.000465825
Plagiochasma appendiculatum	1	0.000465825
Plantago major	1	0.000465825
Plasmopara viticola	1	0.000465825
Platanus x	1	0.000465825
Platycodon grandiflorus	1	0.000465825
Populus alba	1	0.000465825
Populus tremuloides	1	0.000465825
Porphyra purpurea	1	0.000465825
Prasinoderma coloniale	1	0.000465825
Prosopis glandulosa	1	0.000465825
Prosopis juliflora	1	0.000465825
Protoopalina japonica	1	0.000465825
Prototheca wickerhamii	1	0.000465825
Prunus armeniaca	1	0.000465825
Prunus dulcis	1	0.000465825
Prunus maritima	1	0.000465825
Prunus sibirica	1	0.000465825
Prunus triloba	1	0.000465825
Pterogyne nitens	1	0.000465825
Punica granatum	1	0.000465825
Pycnococcus provasolii	1	0.000465825
Pyrenomonas salina	1	0.000465825
Pyrus communis	1	0.000465825
Pythium aphanidermatum	1	0.000465825
Quercus spinosa	1	0.000465825
Reaumuria trigyna	1	0.000465825
Retrophyllum piresii	1	0.000465825
Rhizophora stylosa	1	0.000465825
Rhododendron formosanum	1	0.000465825
Rosa lucieae	1	0.000465825
Rosa roxburghii	1	0.000465825
Rubia cordifolia	1	0.000465825
Rubus deliciosus	1	0.000465825
Ruellia breedlovei	1	0.000465825
Ruscus aculeatus	1	0.000465825
Saccharina sp.	1	0.000465825
Saccharum hybrid	1	0.000465825
Saccharum hybrid	1	0.000465825
Sagittaria trifolia	1	0.000465825
Saintpaulia hybrid	1	0.000465825
Salicornia europaea	1	0.000465825
Salix arbutifolia	1	0.000465825
Salix matsudana	1	0.000465825
Salvia sclarea	1	0.000465825
Santalum album	1	0.000465825
Sarcandra glabra	1	0.000465825
Saussurea japonica	1	0.000465825
Schoenoxiphium ecklonii	1	0.000465825
Schrenkiella parvula	1	0.000465825
Sciadopitys verticillata	1	0.000465825
Scrippsiella trochoidea	1	0.000465825
Secale cereale	1	0.000465825
Senecio squalidus	1	0.000465825
Senecio vulgaris	1	0.000465825
Silene latifolia	1	0.000465825
Silene noctiflora	1	0.000465825
Sindora supa	1	0.000465825
Siphonocladus tropicus	1	0.000465825
Sonneratia alba	1	0.000465825
Spuriopimpinella brachycarpa	1	0.000465825
Stephanomeria virgata	1	0.000465825
Stipa hymenoides	1	0.000465825
Suriana maritima	1	0.000465825
Symbiodinium sp.	1	0.000465825
Tachigali melinonii	1	0.000465825
Taiwania cryptomerioides	1	0.000465825
Tamarix hispida	1	0.000465825
Tanacetum cinerariifolium	1	0.000465825
Taraxacum brevicorniculatum	1	0.000465825
Telipogon pogonostalix	1	0.000465825
Terminalia catappa	1	0.000465825
Tetraselmis subcordiformis	1	0.000465825
Trebouxia sp.	1	0.000465825
Trifolium arvense	1	0.000465825
Trifolium pallescens	1	0.000465825
Tripterygium wilfordii	1	0.000465825
Triticum monococcum	1	0.000465825
Tubocapsicum anomalum	1	0.000465825
Tulipa gesneriana	1	0.000465825
Uncinia uncinata	1	0.000465825
Vanilla planifolia	1	0.000465825
Viburnum dilatatum	1	0.000465825
Vigna aconitifolia	1	0.000465825
Vigna radiata	1	0.000465825
Viola baoshanensis	1	0.000465825
Vitis amurensis	1	0.000465825
Vitis labrusca	1	0.000465825
Vitis rotundifolia	1	0.000465825
Vitis vinifera	1	0.000465825
Wisteria floribunda	1	0.000465825
Withania somnifera	1	0.000465825
Xanthoceras sorbifolium	1	0.000465825
Xerophyta humilis	1	0.000465825
Xiphidium caeruleum	1	0.000465825
Yucca schidigera	1	0.000465825
Zamia muricata	1	0.000465825
Zea mays	1	0.000465825
Zizaniopsis villanensis	1	0.000465825
synthetic construct	1	0.000465825
Total	214673	100
