# Supplementary material for: Transcriptome Analysis of Oleoresin-Producing Tree Sindora Glabra and Characterization of Sesquiterpene Synthases
Source: Front Plant Sci. 2018 Nov 20;9:1619. doi: 10.3389/fpls.2018.01619 (PMC6256070; doi:10.3389/fpls.2018.01619)
Supplement: File S4 — Details of KEGG classifications of all annotated unigenes. [file Table_4.XLSX]

## Sheet: Sheet1
Annotated Gene Number: 90343
Pathway Hierarchy1	Pathway Hierarchy2	KEGG Pathway	Pathway ID	Gene Number
Cellular Processes	Transport and catabolism	Endocytosis	ko04144	2250
	Transport and catabolism	Peroxisome	ko04146	1112
	Transport and catabolism	Phagosome	ko04145	1011
	Transport and catabolism	Regulation of autophagy	ko04140	447
Environmental Information Processing	Membrane transport	ABC transporters	ko02010	352
	Signal transduction	Phosphatidylinositol signaling system	ko04070	815
	Signal transduction	Plant hormone signal transduction	ko04075	1838
Genetic Information Processing	Folding, sorting and degradation	Proteasome	ko03050	596
	Folding, sorting and degradation	Protein export	ko03060	465
	Folding, sorting and degradation	Protein processing in endoplasmic reticulum	ko04141	2260
	Folding, sorting and degradation	RNA degradation	ko03018	1523
	Folding, sorting and degradation	SNARE interactions in vesicular transport	ko04130	388
	Folding, sorting and degradation	Sulfur relay system	ko04122	109
	Folding, sorting and degradation	Ubiquitin mediated proteolysis	ko04120	1509
	Replication and repair	Base excision repair	ko03410	522
	Replication and repair	DNA replication	ko03030	625
	Replication and repair	Homologous recombination	ko03440	650
	Replication and repair	Mismatch repair	ko03430	493
	Replication and repair	Non-homologous end-joining	ko03450	184
	Replication and repair	Nucleotide excision repair	ko03420	745
	Transcription	Basal transcription factors	ko03022	506
	Transcription	RNA polymerase	ko03020	438
	Transcription	Spliceosome	ko03040	2154
	Translation	Aminoacyl-tRNA biosynthesis	ko00970	857
	Translation	RNA transport	ko03013	2036
	Translation	Ribosome	ko03010	2400
	Translation	Ribosome biogenesis in eukaryotes	ko03008	1004
	Translation	mRNA surveillance pathway	ko03015	1582
Metabolism	Amino acid metabolism	Alanine, aspartate and glutamate metabolism	ko00250	730
	Amino acid metabolism	Arginine and proline metabolism	ko00330	644
	Amino acid metabolism	Arginine biosynthesis	ko00220	545
	Amino acid metabolism	Cysteine and methionine metabolism	ko00270	933
	Amino acid metabolism	Glycine, serine and threonine metabolism	ko00260	840
	Amino acid metabolism	Histidine metabolism	ko00340	304
	Amino acid metabolism	Lysine biosynthesis	ko00300	230
	Amino acid metabolism	Lysine degradation	ko00310	461
	Amino acid metabolism	Phenylalanine metabolism	ko00360	350
	Amino acid metabolism	Phenylalanine, tyrosine and tryptophan biosynthesis	ko00400	526
	Amino acid metabolism	Tryptophan metabolism	ko00380	300
	Amino acid metabolism	Tyrosine metabolism	ko00350	424
	Amino acid metabolism	Valine, leucine and isoleucine biosynthesis	ko00290	198
	Amino acid metabolism	Valine, leucine and isoleucine degradation	ko00280	732
	Biosynthesis of other secondary metabolites	Anthocyanin biosynthesis	ko00942	1
	Biosynthesis of other secondary metabolites	Betalain biosynthesis	ko00965	8
	Biosynthesis of other secondary metabolites	Caffeine metabolism	ko00232	35
	Biosynthesis of other secondary metabolites	Flavone and flavonol biosynthesis	ko00944	23
	Biosynthesis of other secondary metabolites	Flavonoid biosynthesis	ko00941	190
	Biosynthesis of other secondary metabolites	Glucosinolate biosynthesis	ko00966	51
	Biosynthesis of other secondary metabolites	Isoflavonoid biosynthesis	ko00943	26
	Biosynthesis of other secondary metabolites	Isoquinoline alkaloid biosynthesis	ko00950	180
	Biosynthesis of other secondary metabolites	Monobactam biosynthesis	ko00261	269
	Biosynthesis of other secondary metabolites	Phenylpropanoid biosynthesis	ko00940	929
	Biosynthesis of other secondary metabolites	Stilbenoid, diarylheptanoid and gingerol biosynthesis	ko00945	89
	Biosynthesis of other secondary metabolites	Tropane, piperidine and pyridine alkaloid biosynthesis	ko00960	228
	Carbohydrate metabolism	Amino sugar and nucleotide sugar metabolism	ko00520	1524
	Carbohydrate metabolism	Ascorbate and aldarate metabolism	ko00053	466
	Carbohydrate metabolism	Butanoate metabolism	ko00650	231
	Carbohydrate metabolism	C5-Branched dibasic acid metabolism	ko00660	85
	Carbohydrate metabolism	Citrate cycle (TCA cycle)	ko00020	764
	Carbohydrate metabolism	Fructose and mannose metabolism	ko00051	711
	Carbohydrate metabolism	Galactose metabolism	ko00052	759
	Carbohydrate metabolism	Glycolysis / Gluconeogenesis	ko00010	1780
	Carbohydrate metabolism	Glyoxylate and dicarboxylate metabolism	ko00630	1025
	Carbohydrate metabolism	Inositol phosphate metabolism	ko00562	686
	Carbohydrate metabolism	Pentose and glucuronate interconversions	ko00040	567
	Carbohydrate metabolism	Pentose phosphate pathway	ko00030	679
	Carbohydrate metabolism	Propanoate metabolism	ko00640	527
	Carbohydrate metabolism	Pyruvate metabolism	ko00620	1343
	Carbohydrate metabolism	Starch and sucrose metabolism	ko00500	2081
	Energy metabolism	Carbon fixation in photosynthetic organisms	ko00710	893
	Energy metabolism	Nitrogen metabolism	ko00910	423
	Energy metabolism	Oxidative phosphorylation	ko00190	1393
	Energy metabolism	Photosynthesis	ko00195	403
	Energy metabolism	Photosynthesis - antenna proteins	ko00196	336
	Energy metabolism	Sulfur metabolism	ko00920	390
	Glycan biosynthesis and metabolism	Glycosaminoglycan degradation	ko00531	311
	Glycan biosynthesis and metabolism	Glycosphingolipid biosynthesis - ganglio series	ko00604	81
	Glycan biosynthesis and metabolism	Glycosphingolipid biosynthesis - globo series	ko00603	61
	Glycan biosynthesis and metabolism	Glycosylphosphatidylinositol(GPI)-anchor biosynthesis	ko00563	452
	Glycan biosynthesis and metabolism	N-Glycan biosynthesis	ko00510	639
	Glycan biosynthesis and metabolism	Other glycan degradation	ko00511	318
	Glycan biosynthesis and metabolism	Other types of O-glycan biosynthesis	ko00514	72
	Lipid metabolism	Arachidonic acid metabolism	ko00590	210
	Lipid metabolism	Biosynthesis of unsaturated fatty acids	ko01040	297
	Lipid metabolism	Cutin, suberine and wax biosynthesis	ko00073	63
	Lipid metabolism	Ether lipid metabolism	ko00565	326
	Lipid metabolism	Fatty acid biosynthesis	ko00061	578
	Lipid metabolism	Fatty acid degradation	ko00071	613
	Lipid metabolism	Fatty acid elongation	ko00062	199
	Lipid metabolism	Glycerolipid metabolism	ko00561	661
	Lipid metabolism	Glycerophospholipid metabolism	ko00564	1001
	Lipid metabolism	Linoleic acid metabolism	ko00591	131
	Lipid metabolism	Sphingolipid metabolism	ko00600	357
	Lipid metabolism	Steroid biosynthesis	ko00100	352
	Lipid metabolism	Synthesis and degradation of ketone bodies	ko00072	91
	Lipid metabolism	alpha-Linolenic acid metabolism	ko00592	292
	Metabolism of cofactors and vitamins	Biotin metabolism	ko00780	298
	Metabolism of cofactors and vitamins	Folate biosynthesis	ko00790	193
	Metabolism of cofactors and vitamins	Lipoic acid metabolism	ko00785	40
	Metabolism of cofactors and vitamins	Nicotinate and nicotinamide metabolism	ko00760	320
	Metabolism of cofactors and vitamins	One carbon pool by folate	ko00670	299
	Metabolism of cofactors and vitamins	Pantothenate and CoA biosynthesis	ko00770	316
	Metabolism of cofactors and vitamins	Porphyrin and chlorophyll metabolism	ko00860	484
	Metabolism of cofactors and vitamins	Riboflavin metabolism	ko00740	94
	Metabolism of cofactors and vitamins	Thiamine metabolism	ko00730	114
	Metabolism of cofactors and vitamins	Ubiquinone and other terpenoid-quinone biosynthesis	ko00130	501
	Metabolism of cofactors and vitamins	Vitamin B6 metabolism	ko00750	142
	Metabolism of other amino acids	Cyanoamino acid metabolism	ko00460	645
	Metabolism of other amino acids	Glutathione metabolism	ko00480	851
	Metabolism of other amino acids	Selenocompound metabolism	ko00450	388
	Metabolism of other amino acids	Taurine and hypotaurine metabolism	ko00430	168
	Metabolism of other amino acids	beta-Alanine metabolism	ko00410	608
	Metabolism of terpenoids and polyketides	Brassinosteroid biosynthesis	ko00905	48
	Metabolism of terpenoids and polyketides	Carotenoid biosynthesis	ko00906	650
	Metabolism of terpenoids and polyketides	Diterpenoid biosynthesis	ko00904	191
	Metabolism of terpenoids and polyketides	Limonene and pinene degradation	ko00903	108
	Metabolism of terpenoids and polyketides	Monoterpenoid biosynthesis	ko00902	82
	Metabolism of terpenoids and polyketides	Sesquiterpenoid and triterpenoid biosynthesis	ko00909	144
	Metabolism of terpenoids and polyketides	Terpenoid backbone biosynthesis	ko00900	670
	Metabolism of terpenoids and polyketides	Zeatin biosynthesis	ko00908	238
	Nucleotide metabolism	Purine metabolism	ko00230	2177
	Nucleotide metabolism	Pyrimidine metabolism	ko00240	1527
	Overview	2-Oxocarboxylic acid metabolism	ko01210	715
	Overview	Biosynthesis of amino acids	ko01230	3100
	Overview	Carbon metabolism	ko01200	3669
	Overview	Degradation of aromatic compounds	ko01220	118
	Overview	Fatty acid metabolism	ko01212	934
Organismal Systems	Environmental adaptation	Circadian rhythm - plant	ko04712	511
	Environmental adaptation	Plant-pathogen interaction	ko04626	2258
