# Supplementary material for: Transcriptome Analysis of Oleoresin-Producing Tree Sindora Glabra and Characterization of Sesquiterpene Synthases
Source: Front Plant Sci. 2018 Nov 20;9:1619. doi: 10.3389/fpls.2018.01619 (PMC6256070; doi:10.3389/fpls.2018.01619)
Supplement: File S8 — Details of differentially expressed CYPs genes. [file Table_8.XLSX]

## Sheet: CYPs
gene_id	L4	L6	H10	H12	Gene Length	NR GI	NR ID	NR Score	NR Evalue	NR Description	NT GI	NT ID	NT Score	NT Evalue	NT Description	KO ID	KO Name	KO Description	Swissprot ID	Swissprot Score	Swissprot Evalue	Swissprot Description	PFAM ID	PFAM description	Gene Ontology Biological Pathway	BP Description	Gene Ontology Molecular Function	MF Description	Gene Ontology Cellular Component	CC Description	KOG ID	KOG ID	KOG Description	KOG Description	UP_DOWN_REGULATION(H12vsL4)	log2ratio(H12vsL4)	q value(H12vsL4)	UP_DOWN_REGULATION(H10vsL4)	log2ratio(H10vsL4)	q value(H10vsL4)	UP_DOWN_REGULATION(H12vsL6)	log2ratio(H12vsL6)	q value(H12vsL6)	UP_DOWN_REGULATION(H10vsL6)	log2ratio(H10vsL6)	q value(H10vsL6)
Cluster-32860.240776	0.98	1.64667	1.38333	3.92333	2718	802699042	XP_012083539.1	562	3.5e-55	PREDICTED: cytochrome P450 704C1-like [Jatropha curcas]>gi|643717102|gb|KDP28728.1| hypothetical protein JCGZ_14499 [Jatropha curcas]	--	--	--	--	--	--	--	--	Q50EK3	413	9.4e-39	Cytochrome P450 704C1 OS=Pinus taeda GN=CYP704C1 PE=2 SV=1	PF05418//PF00067	Apovitellenin I (Apo-VLDL-II)//Cytochrome P450	GO:0055114//GO:0006629	oxidation-reduction process//lipid metabolic process	GO:0004857//GO:0020037//GO:0016705//GO:0005506	enzyme inhibitor activity//heme binding//oxidoreductase activity, acting on paired donors, with incorporation or reduction of molecular oxygen//iron ion binding	GO:0042627	chylomicron	--	--	--	--	UP	1.9917	0.014552	FALSE	0.50819	1	FALSE	1.3097	0.25931	FALSE	-0.14641	1
Cluster-32860.221430	4.01667	0.0866667	0.0533333	15.05	861	356495913	XP_003516815.1	918	5.9e-97	PREDICTED: cytochrome P450 83B1-like [Glycine max]	--	--	--	--	--	--	--	--	O65782	696	4.5e-72	Cytochrome P450 83B1 OS=Arabidopsis thaliana GN=CYP83B1 PE=1 SV=1	PF00067	Cytochrome P450	GO:0055114	oxidation-reduction process	GO:0020037//GO:0005506//GO:0016705	heme binding//iron ion binding//oxidoreductase activity, acting on paired donors, with incorporation or reduction of molecular oxygen	--	--	--	--	--	--	UP	1.9089	0.029847	DOWN	-6.3248	0.03516	UP	7.4835	4.1227e-14	FALSE	-0.73686	1
Cluster-32860.225403	3.31667	7.41	2.70667	12.85	1863	571435915	XP_006573615.1	1762	1.7e-194	PREDICTED: cytochrome P450 82A3-like isoform X2 [Glycine max]	452726388	NM_001249250.2	498	0	Glycine max cytochrome P450 CYP82C1 (CYP82C1), mRNA	--	--	--	O49858	1257	8.7e-137	Cytochrome P450 82A3 OS=Glycine max GN=CYP82A3 PE=2 SV=1	PF00067	Cytochrome P450	GO:0055114	oxidation-reduction process	GO:0020037//GO:0005506//GO:0016705	heme binding//iron ion binding//oxidoreductase activity, acting on paired donors, with incorporation or reduction of molecular oxygen	--	--	--	--	--	--	UP	1.9392	0.017445	FALSE	-0.29535	1	FALSE	0.86298	0.79537	FALSE	-1.3455	0.84974
Cluster-7391.10	0.08	0.723333	2.69667	10.17	548	371940464	BAL45206.1	608	3.3e-61	cytochrome P450 monooxygenase [Glycyrrhiza uralensis]	571500784	XM_003543123.2	123	9.93087e-56	PREDICTED: Glycine max 11-oxo-beta-amyrin 30-oxidase-like (LOC100782454), mRNA	--	--	--	H2DH21	481	2.5e-47	Cytochrome P450 CYP72A219 OS=Panax ginseng PE=2 SV=1	PF00067	Cytochrome P450	GO:0055114	oxidation-reduction process	GO:0020037//GO:0005506//GO:0016705	heme binding//iron ion binding//oxidoreductase activity, acting on paired donors, with incorporation or reduction of molecular oxygen	--	--	--	--	--	--	UP	7.3811	0.032805	FALSE	5.4132	0.21532	FALSE	3.8857	0.38939	FALSE	1.934	1
Cluster-32860.168835	2.19333	0	0.25	7.26	1875	571466986	XP_003529310.2	1553	3e-170	PREDICTED: cytochrome P450 71A6-like [Glycine max]	388518142	BT147339.1	114	3.57913e-50	Lotus japonicus clone JCVI-FLLj-23B9 unknown mRNA	--	--	--	O04164	1180	7.4e-128	Cytochrome P450 71A6 (Fragment) OS=Nepeta racemosa GN=CYP71A6 PE=2 SV=1	PF00067//PF08027//PF09815	Cytochrome P450//Albumin I chain b//XK-related protein	GO:0055114//GO:0009405	oxidation-reduction process//pathogenesis	GO:0045735//GO:0016705//GO:0005506//GO:0020037	nutrient reservoir activity//oxidoreductase activity, acting on paired donors, with incorporation or reduction of molecular oxygen//iron ion binding//heme binding	GO:0016021	integral component of membrane	--	--	--	--	UP	1.7053	0.020702	DOWN	-3.1236	0.0033758	UP	Inf	1.2408e-19	FALSE	Inf	0.83249
Cluster-7391.1	0.0433333	0.16	0.393333	1.81333	940	734413375	KHN36820.1	999	2.6e-106	Secologanin synthase [Glycine soja]	292727714	AK336336.1	256	2.03638e-129	Lotus japonicus cDNA, clone: LjCa-007-AH09, HTC	--	--	--	H1A981	902	6.4e-96	11-oxo-beta-amyrin 30-oxidase OS=Medicago truncatula GN=CYP72A63 PE=1 SV=1	PF00067	Cytochrome P450	GO:0055114	oxidation-reduction process	GO:0020037//GO:0005506//GO:0016705	heme binding//iron ion binding//oxidoreductase activity, acting on paired donors, with incorporation or reduction of molecular oxygen	--	--	--	--	--	--	UP	5.3723	0.032272	FALSE	3.173	1	FALSE	3.5642	0.24676	FALSE	1.3932	1
Cluster-7391.5	0.503333	1.57333	4.87667	12.6	963	371940464	BAL45206.1	1008	2.4e-107	cytochrome P450 monooxygenase [Glycyrrhiza uralensis]	571521319	XM_003546703.2	278	1.23031e-141	PREDICTED: Glycine max 11-oxo-beta-amyrin 30-oxidase-like (LOC100808323), transcript variant X1, mRNA	--	--	--	H1A981	918	9.1e-98	11-oxo-beta-amyrin 30-oxidase OS=Medicago truncatula GN=CYP72A63 PE=1 SV=1	PF00067	Cytochrome P450	GO:0055114	oxidation-reduction process	GO:0005506//GO:0016705//GO:0020037	iron ion binding//oxidoreductase activity, acting on paired donors, with incorporation or reduction of molecular oxygen//heme binding	--	--	--	--	--	--	UP	4.6396	0.022308	UP	3.2677	0.0014763	FALSE	3.0794	0.19733	FALSE	1.7264	0.27321
Cluster-32860.225404	0.36	1.02	0.533333	2.40667	2214	571435915	XP_006573615.1	986	2e-104	PREDICTED: cytochrome P450 82A3-like isoform X2 [Glycine max]	452726388	NM_001249250.2	262	2.26189e-132	Glycine max cytochrome P450 CYP82C1 (CYP82C1), mRNA	--	--	--	O49858	685	2.2e-70	Cytochrome P450 82A3 OS=Glycine max GN=CYP82A3 PE=2 SV=1	PF00067	Cytochrome P450	GO:0055114	oxidation-reduction process	GO:0016705//GO:0005506//GO:0020037	oxidoreductase activity, acting on paired donors, with incorporation or reduction of molecular oxygen//iron ion binding//heme binding	--	--	--	--	--	--	UP	2.6885	0.0069676	FALSE	0.51997	1	FALSE	1.2862	0.5376	FALSE	-0.86084	1
Cluster-32860.24090	0.36	2.01667	1.86667	2.21333	3403	502157845	XP_004510930.1	1753	3.5e-193	PREDICTED: cytochrome P450 704C1 [Cicer arietinum]	571465526	XM_003528874.2	611	0	PREDICTED: Glycine max cytochrome P450 704C1-like (LOC100789049), transcript variant 1, mRNA	--	--	--	Q50EK3	1059	1.4e-113	Cytochrome P450 704C1 OS=Pinus taeda GN=CYP704C1 PE=2 SV=1	PF00067	Cytochrome P450	GO:0055114	oxidation-reduction process	GO:0005506//GO:0016705//GO:0020037	iron ion binding//oxidoreductase activity, acting on paired donors, with incorporation or reduction of molecular oxygen//heme binding	--	--	--	--	--	--	UP	2.6013	0.00099851	UP	2.3787	0.0014607	FALSE	0.18957	1	FALSE	-0.0078152	1
Cluster-32860.85852	1.38333	3.41	2.19667	27.4633	1756	356510318	XP_003523886.1	1723	5.4e-190	PREDICTED: cytochrome P450 82A1-like [Glycine max]	--	--	--	--	--	--	--	--	O49859	1343	8.7e-147	Cytochrome P450 82A4 OS=Glycine max GN=CYP82A4 PE=2 SV=1	PF00067	Cytochrome P450	GO:0055114	oxidation-reduction process	GO:0016705//GO:0005506//GO:0020037	oxidoreductase activity, acting on paired donors, with incorporation or reduction of molecular oxygen//iron ion binding//heme binding	--	--	--	--	--	--	UP	4.2968	1.8801e-16	FALSE	0.65684	1	UP	3.0929	1.1755e-08	FALSE	-0.52598	1
Cluster-32860.221908	0	0	0.193333	2.00333	1491	351724791	NP_001235534.1	1411	6.9e-154	cytochrome P450 97B2, chloroplastic [Glycine max]>gi|5915855|sp|O48921.1|C97B2_SOYBN RecName: Full=Cytochrome P450 97B2, chloroplastic; Flags: Precursor>gi|2738996|gb|AAB94586.1| CYP97B2p [Glycine max]	351724790	NM_001248605.1	520	0	Glycine max Cytochrome P450 97B2 (CYP97B2), mRNA >gnl|BL_ORD_ID|235788 Glycine max cytochrome P450 monooxygenase CYP97B2p (CYP97B2) mRNA, complete cds	--	--	--	O48921	1411	9.7e-155	Cytochrome P450 97B2, chloroplastic OS=Glycine max GN=CYP97B2 PE=2 SV=1	PF00067	Cytochrome P450	GO:0006118//GO:0055114	obsolete electron transport//oxidation-reduction process	GO:0016705//GO:0004497//GO:0005506//GO:0009055//GO:0020037	oxidoreductase activity, acting on paired donors, with incorporation or reduction of molecular oxygen//monooxygenase activity//iron ion binding//electron carrier activity//heme binding	GO:0031969	chloroplast membrane	KOG0157	KOG0157	Cytochrome P450 CYP4/CYP19/CYP26 subfamilies	Cytochrome P450 CYP4/CYP19/CYP26 subfamilies	UP	Inf	4.2685e-06	FALSE	Inf	1	UP	Inf	1.3925e-05	FALSE	Inf	1
Cluster-32860.2439	0.05	0.393333	0.223333	0.753333	2656	358248834	NP_001239692.1	875	1.7e-91	cytochrome P450 71A9 precursor [Glycine max]>gi|5915816|sp|O81970.1|C71A9_SOYBN RecName: Full=Cytochrome P450 71A9; AltName: Full=Cytochrome P450 CP1>gi|3334659|emb|CAA71513.1| putative cytochrome P450 [Glycine max]	--	--	--	--	--	--	--	--	O81970	875	2.5e-92	Cytochrome P450 71A9 OS=Glycine max GN=CYP71A9 PE=2 SV=1	PF00067	Cytochrome P450	GO:0055114	oxidation-reduction process	GO:0016491//GO:0046872//GO:0020037//GO:0016705//GO:0005506	oxidoreductase activity//metal ion binding//heme binding//oxidoreductase activity, acting on paired donors, with incorporation or reduction of molecular oxygen//iron ion binding	GO:0016020	membrane	--	--	--	--	UP	3.9671	0.030536	FALSE	2.2004	1	FALSE	0.99399	1	FALSE	-0.74822	1
Cluster-32860.93916	2.03	0.0366667	2.95333	0.19	2218	657948472	XP_008337913.1	1949	4.2e-216	PREDICTED: cytochrome P450 84A1-like [Malus domestica]	210145178	AK243869.1	541	0	Glycine max cDNA, clone: GMFL01-01-H15	K09755	CYP84A, F5H	ferulate-5-hydroxylase	Q42600	1811	6e-201	Cytochrome P450 84A1 OS=Arabidopsis thaliana GN=CYP84A1 PE=1 SV=1	PF00067//PF05866	Cytochrome P450//Endodeoxyribonuclease RusA	GO:0055114//GO:0006310//GO:0006281	oxidation-reduction process//DNA recombination//DNA repair	GO:0000287//GO:0020037//GO:0016705//GO:0005506	magnesium ion binding//heme binding//oxidoreductase activity, acting on paired donors, with incorporation or reduction of molecular oxygen//iron ion binding	--	--	--	--	--	--	DOWN	-3.4207	0.047313	FALSE	0.57032	1	FALSE	2.3368	1	UP	6.366	0.048777
Cluster-32860.242537	0	0.183333	0.213333	1.46667	2615	356522526	XP_003529897.1	2008	7.2e-223	PREDICTED: 3-epi-6-deoxocathasterone 23-monooxygenase-like isoformX1 [Glycine max]	593266759	XM_007135496.1	719	0	Phaseolus vulgaris hypothetical protein (PHAVU_010G139600g) mRNA, complete cds	K12638	CYP90D1	3-epi-6-deoxocathasterone 23-monooxygenase	Q94IA6	1630	6.8e-180	3-epi-6-deoxocathasterone 23-monooxygenase OS=Arabidopsis thaliana GN=CYP90D1 PE=2 SV=1	PF00067//PF05144	Cytochrome P450//Phage replication protein CRI	GO:0055114//GO:0006260	oxidation-reduction process//DNA replication	GO:0020037//GO:0016705//GO:0005506	heme binding//oxidoreductase activity, acting on paired donors, with incorporation or reduction of molecular oxygen//iron ion binding	--	--	--	--	--	--	UP	Inf	1.0916e-07	FALSE	Inf	1	UP	2.9782	0.014584	FALSE	0.30159	1
Cluster-32860.73922	0.0866667	1.1	1.64667	0.08	2179	590591790	XP_007017115.1	1355	3.1e-147	Cytochrome P450 [Theobroma cacao]>gi|508787478|gb|EOY34734.1| Cytochrome P450 [Theobroma cacao]	571543215	XM_003552855.2	426	0	PREDICTED: Glycine max cytochrome P450 714C2-like (LOC100785420), mRNA	--	--	--	Q2QYH7	1000	6.4e-107	Cytochrome P450 714C2 OS=Oryza sativa subsp. japonica GN=CYP714C2 PE=2 SV=1	PF10717//PF00957//PF00067	Occlusion-derived virus envelope protein ODV-E18//Synaptobrevin//Cytochrome P450	GO:0016192//GO:0055114	vesicle-mediated transport//oxidation-reduction process	GO:0016705//GO:0005506//GO:0020037	oxidoreductase activity, acting on paired donors, with incorporation or reduction of molecular oxygen//iron ion binding//heme binding	GO:0016021//GO:0019031	integral component of membrane//viral envelope	--	--	--	--	FALSE	0.040432	1	UP	4.3412	8.6065e-05	DOWN	-3.6867	0.027744	FALSE	0.6475	1
Cluster-32860.71040	0	2.16667	0.706667	0.153333	2466	371940448	BAL45198.1	1270	2.6e-137	cytochrome P450 monooxygenase [Medicago truncatula]	828292102	XM_004488611.2	315	8.69883e-162	PREDICTED: Cicer arietinum cytochrome P450 CYP72A219-like (LOC101500476), transcript variant X1, mRNA	--	--	--	H2DH21	996	2.1e-106	Cytochrome P450 CYP72A219 OS=Panax ginseng PE=2 SV=1	PF00067	Cytochrome P450	GO:0055114	oxidation-reduction process	GO:0020037//GO:0016705//GO:0005506	heme binding//oxidoreductase activity, acting on paired donors, with incorporation or reduction of molecular oxygen//iron ion binding	--	--	--	--	--	--	FALSE	Inf	0.71195	UP	Inf	0.00057472	DOWN	-3.8032	0.00020527	FALSE	-1.4943	0.3367
Cluster-32860.134051	1.91667	3.47333	7.01667	4.28667	2368	734356541	KHN14193.1	276	4.5e-22	Secologanin synthase [Glycine soja]	695016601	XM_009396940.1	38	8.03604e-08	PREDICTED: Musa acuminata subsp. malaccensis cytochrome P450 CYP72A219-like (LOC103980501), mRNA	--	--	--	H1A988	259	5.9e-21	11-oxo-beta-amyrin 30-oxidase OS=Glycyrrhiza uralensis GN=CYP72A154 PE=1 SV=1	PF07224//PF00067	Chlorophyllase//Cytochrome P450	GO:0015994//GO:0015996//GO:0055114	chlorophyll metabolic process//chlorophyll catabolic process//oxidation-reduction process	GO:0016705//GO:0005506//GO:0047746//GO:0020037	oxidoreductase activity, acting on paired donors, with incorporation or reduction of molecular oxygen//iron ion binding//chlorophyllase activity//heme binding	--	--	--	--	--	--	FALSE	1.1531	0.75014	UP	1.8842	0.00011932	FALSE	0.34072	1	FALSE	1.0956	0.23663
Cluster-32860.134048	1.17	5.30333	11.7567	6.38667	795	697186406	XP_009602242.1	192	8.3e-13	PREDICTED: cytochrome P450 CYP72A219-like [Nicotiana tomentosiformis]	388498159	BT137351.1	51	1.55592e-15	Medicago truncatula clone JCVI-FLMt-20B2 unknown mRNA	--	--	--	Q05047	163	2.7e-10	Secologanin synthase OS=Catharanthus roseus GN=CYP72A1 PE=2 SV=1	--	--	--	--	--	--	--	--	--	--	--	--	FALSE	2.4518	0.49045	UP	3.3406	0.0020401	FALSE	0.31387	1	FALSE	1.2282	0.91179
Cluster-32860.24088	0.373333	1.71	2.43667	1.31	3237	502157845	XP_004510930.1	1753	3.3e-193	PREDICTED: cytochrome P450 704C1 [Cicer arietinum]	571465526	XM_003528874.2	611	0	PREDICTED: Glycine max cytochrome P450 704C1-like (LOC100789049), transcript variant 1, mRNA	--	--	--	Q50EK3	1059	1.4e-113	Cytochrome P450 704C1 OS=Pinus taeda GN=CYP704C1 PE=2 SV=1	PF00067	Cytochrome P450	GO:0055114	oxidation-reduction process	GO:0005506//GO:0016705//GO:0020037	iron ion binding//oxidoreductase activity, acting on paired donors, with incorporation or reduction of molecular oxygen//heme binding	--	--	--	--	--	--	FALSE	1.8229	0.70553	UP	2.7389	5.8196e-05	FALSE	-0.33606	1	FALSE	0.61046	1
Cluster-32860.174609	3.56333	8.96667	44.3533	9.11667	1872	731433189	XP_010644548.1	1493	2.7e-163	PREDICTED: premnaspirodiene oxygenase-like [Vitis vinifera]	357491154	XM_003615817.1	130	4.55741e-59	Medicago truncatula Cytochrome P450 (MTR_5g073250) mRNA, complete cds	--	--	--	O48923	1387	7.4e-152	Cytochrome P450 71D10 OS=Glycine max GN=CYP71D10 PE=2 SV=1	PF00067//PF07955//PF06026	Cytochrome P450//Protein of unknown function (DUF1687)//Ribose 5-phosphate isomerase A (phosphoriboisomerase A)	GO:0006098//GO:0009052//GO:0015976//GO:0055114	pentose-phosphate shunt//pentose-phosphate shunt, non-oxidative branch//carbon utilization//oxidation-reduction process	GO:0016705//GO:0005506//GO:0004751//GO:0020037//GO:0016491	oxidoreductase activity, acting on paired donors, with incorporation or reduction of molecular oxygen//iron ion binding//ribose-5-phosphate isomerase activity//heme binding//oxidoreductase activity	GO:0005739	mitochondrion	--	--	--	--	FALSE	1.3375	1	UP	3.6177	0.0090245	FALSE	0.079604	1	FALSE	2.3738	0.15432
Cluster-32860.13127	0.0166667	0.52	1.10333	0.616667	1960	356525339	XP_003531282.1	1786	3e-197	PREDICTED: cytochrome P450 716B2-like isoformX1 [Glycine max]	571471112	XM_003531234.2	468	0	PREDICTED: Glycine max cytochrome P450 716B2-like (LOC100778750), transcript variant X1, mRNA	--	--	--	I7C6E8	1319	5.9e-144	Beta-amyrin 28-oxidase OS=Panax ginseng PE=2 SV=1	PF00067//PF06072	Cytochrome P450//Alphaherpesvirus tegument protein US9	GO:0055114	oxidation-reduction process	GO:0016705//GO:0005506//GO:0020037	oxidoreductase activity, acting on paired donors, with incorporation or reduction of molecular oxygen//iron ion binding//heme binding	GO:0019033	viral tegument	--	--	--	--	FALSE	5.1863	0.071235	UP	6.0261	0.025087	FALSE	0.30779	1	FALSE	1.1649	1
Cluster-32860.20772	7.38333	0	0.0433333	2.79	1379	225455439	XP_002274562.1	380	2.3e-34	PREDICTED: probable (S)-N-methylcoclaurine 3'-hydroxylase isozyme 2 [Vitis vinifera]	--	--	--	--	--	--	--	--	Q9FXW4	234	2.7e-18	Probable (S)-N-methylcoclaurine 3'-hydroxylase isozyme 2 OS=Coptis japonica GN=CYP80B2 PE=2 SV=1	PF00067//PF00394	Cytochrome P450//Multicopper oxidase	GO:0055114	oxidation-reduction process	GO:0005506//GO:0016705//GO:0020037//GO:0016491	iron ion binding//oxidoreductase activity, acting on paired donors, with incorporation or reduction of molecular oxygen//heme binding//oxidoreductase activity	--	--	--	--	--	--	FALSE	-1.413	0.15462	DOWN	-7.5328	4.4548e-18	UP	Inf	4.3219e-07	FALSE	Inf	1
Cluster-32860.34238	0	1.22333	1.23	0.463333	2291	388502102	AFK39117.1	1047	1.7e-111	unknown [Lotus japonicus]	356518025	XM_003527637.1	195	4.11763e-95	PREDICTED: Glycine max abscisic acid 8'-hydroxylase 2-like (LOC100811692), mRNA	K07437	CYP26A	cytochrome P450, family 26, subfamily A	Q50EK5	321	3.7e-28	Cytochrome P450 720B2 OS=Pinus taeda GN=CYP720B2 PE=2 SV=1	PF00067	Cytochrome P450	GO:0055114	oxidation-reduction process	GO:0020037//GO:0005506//GO:0016705	heme binding//iron ion binding//oxidoreductase activity, acting on paired donors, with incorporation or reduction of molecular oxygen	--	--	--	--	--	--	FALSE	Inf	0.47643	UP	Inf	1.6819e-06	FALSE	-1.3065	1	FALSE	0.1255	1
Cluster-28825.0	0.04	0.263333	0.676667	0.123333	3098	593489811	XP_007141773.1	1928	1.6e-213	hypothetical protein PHAVU_008G224600g [Phaseolus vulgaris]>gi|561014906|gb|ESW13767.1| hypothetical protein PHAVU_008G224600g [Phaseolus vulgaris]	571490056	XM_003538412.2	575	0	PREDICTED: Glycine max cytochrome P450 90A1-like (CYP90A15), mRNA	K09588	CYP90A1, CPD	cytochrome P450, family 90, subfamily A, polypeptide 1	Q42569	1710	4.3e-189	Cytochrome P450 90A1 OS=Arabidopsis thaliana GN=CYP90A1 PE=2 SV=1	PF00067	Cytochrome P450	GO:0055114	oxidation-reduction process	GO:0020037//GO:0016705//GO:0005506	heme binding//oxidoreductase activity, acting on paired donors, with incorporation or reduction of molecular oxygen//iron ion binding	--	--	--	--	--	--	FALSE	1.8286	1	UP	4.3139	0.0069779	FALSE	-1.0237	1	FALSE	1.4833	1
Cluster-28825.1	1.24667	2.72667	6.78	2.27333	2283	593489811	XP_007141773.1	2082	1.6e-231	hypothetical protein PHAVU_008G224600g [Phaseolus vulgaris]>gi|561014906|gb|ESW13767.1| hypothetical protein PHAVU_008G224600g [Phaseolus vulgaris]	571490056	XM_003538412.2	626	0	PREDICTED: Glycine max cytochrome P450 90A1-like (CYP90A15), mRNA	K09588	CYP90A1, CPD	cytochrome P450, family 90, subfamily A, polypeptide 1	Q42569	1853	8.3e-206	Cytochrome P450 90A1 OS=Arabidopsis thaliana GN=CYP90A1 PE=2 SV=1	PF00067	Cytochrome P450	GO:0055114	oxidation-reduction process	GO:0020037//GO:0016705//GO:0005506	heme binding//oxidoreductase activity, acting on paired donors, with incorporation or reduction of molecular oxygen//iron ion binding	--	--	--	--	--	--	FALSE	0.84681	0.8618	UP	2.4521	0.020762	FALSE	-0.22332	1	FALSE	1.4092	0.42457
Cluster-32860.110032	57.5333	105.293	174.783	87.79	746	743933799	XP_011011227.1	964	2.3e-102	PREDICTED: flavonoid 3'-monooxygenase [Populus euphratica]	571453415	XM_006579446.1	143	1.04849e-66	PREDICTED: Glycine max flavonoid 3'-monooxygenase-like (LOC100778531), transcript variant X2, mRNA	K05280	E1.14.13.21	flavonoid 3'-monooxygenase	Q9SBQ9	876	5.3e-93	Flavonoid 3'-monooxygenase OS=Petunia hybrida GN=CYP75B2 PE=2 SV=1	PF00067//PF11716	Cytochrome P450//Mycothiol maleylpyruvate isomerase N-terminal domain	GO:0055114	oxidation-reduction process	GO:0046872//GO:0020037//GO:0016705//GO:0005506	metal ion binding//heme binding//oxidoreductase activity, acting on paired donors, with incorporation or reduction of molecular oxygen//iron ion binding	--	--	--	--	--	--	FALSE	0.62686	1	UP	1.6129	6.6545e-07	FALSE	-0.22539	1	FALSE	0.78766	0.8115
Cluster-32860.221431	1.35333	0	0.113333	3.85	1413	356495913	XP_003516815.1	805	1.2e-83	PREDICTED: cytochrome P450 83B1-like [Glycine max]	--	--	--	--	--	--	--	--	Q9LIP3	634	1.2e-64	Cytochrome P450 71B37 OS=Arabidopsis thaliana GN=CYP71B37 PE=3 SV=2	PF00067	Cytochrome P450	GO:0055114	oxidation-reduction process	GO:0016705//GO:0005506//GO:0020037	oxidoreductase activity, acting on paired donors, with incorporation or reduction of molecular oxygen//iron ion binding//heme binding	--	--	--	--	--	--	FALSE	1.5102	0.49894	FALSE	-3.4501	0.84387	UP	Inf	1.4745e-09	FALSE	Inf	1
Cluster-32860.223591	5.62667	0.133333	2.64667	2.94333	1974	734416410	KHN38289.1	1705	7.4e-188	Taxadiene 5-alpha hydroxylase [Glycine soja]	590607060	XM_007020842.1	261	7.23916e-132	Theobroma cacao Cytochrome P450 (TCM_030948) mRNA, complete cds	--	--	--	Q6WG30	892	1.9e-94	Taxadiene 5-alpha hydroxylase OS=Taxus cuspidata PE=1 SV=2	PF00067	Cytochrome P450	GO:0055114	oxidation-reduction process	GO:0016705//GO:0005506//GO:0020037	oxidoreductase activity, acting on paired donors, with incorporation or reduction of molecular oxygen//iron ion binding//heme binding	--	--	--	--	--	--	FALSE	-0.95008	0.46174	FALSE	-1.09	0.29315	UP	4.5617	8.1328e-06	UP	4.4473	0.00015818
Cluster-32860.221104	5.46	0.48	0.2	16.5	813	356506453	XP_003521997.1	867	4.5e-91	PREDICTED: cytochrome P450 83B1-like [Glycine max]	--	--	--	--	--	--	--	--	O65782	602	3.4e-61	Cytochrome P450 83B1 OS=Arabidopsis thaliana GN=CYP83B1 PE=1 SV=1	PF00067	Cytochrome P450	GO:0055114	oxidation-reduction process	GO:0020037//GO:0005506//GO:0016705	heme binding//iron ion binding//oxidoreductase activity, acting on paired donors, with incorporation or reduction of molecular oxygen	--	--	--	--	--	--	FALSE	1.6001	0.067914	FALSE	-4.7607	0.14658	UP	5.1607	7.9833e-10	FALSE	-1.1707	1
Cluster-32860.2441	0.106667	0	0.0833333	0.616667	2506	358248834	NP_001239692.1	875	1.7e-91	cytochrome P450 71A9 precursor [Glycine max]>gi|5915816|sp|O81970.1|C71A9_SOYBN RecName: Full=Cytochrome P450 71A9; AltName: Full=Cytochrome P450 CP1>gi|3334659|emb|CAA71513.1| putative cytochrome P450 [Glycine max]	--	--	--	--	--	--	--	--	O81970	875	2.3e-92	Cytochrome P450 71A9 OS=Glycine max GN=CYP71A9 PE=2 SV=1	PF00067	Cytochrome P450	GO:0055114	oxidation-reduction process	GO:0016705//GO:0005506//GO:0046872//GO:0016491//GO:0020037	oxidoreductase activity, acting on paired donors, with incorporation or reduction of molecular oxygen//iron ion binding//metal ion binding//oxidoreductase activity//heme binding	GO:0016020	membrane	--	--	--	--	FALSE	2.5542	0.35426	FALSE	-0.32018	1	UP	Inf	0.0042386	FALSE	Inf	1
Cluster-32860.223101	0.706667	0	0.356667	1.1	1576	657405028	KEH43603.1	864	2e-90	cytochrome P450 family protein [Medicago truncatula]	702340245	XM_010057907.1	87	3.06182e-35	PREDICTED: Eucalyptus grandis geraniol 8-hydroxylase-like (LOC104444260), mRNA	--	--	--	D1MI46	502	2.6e-49	Geraniol 8-hydroxylase OS=Swertia mussotii GN=CYP76B10 PE=1 SV=1	PF00067	Cytochrome P450	GO:0055114	oxidation-reduction process	GO:0016705//GO:0005506//GO:0020037	oxidoreductase activity, acting on paired donors, with incorporation or reduction of molecular oxygen//iron ion binding//heme binding	--	--	--	--	--	--	FALSE	0.64509	1	FALSE	-0.97791	1	UP	Inf	0.0033364	FALSE	Inf	0.67254
