# Supplementary material for: Transcriptome Analysis of Oleoresin-Producing Tree Sindora Glabra and Characterization of Sesquiterpene Synthases
Source: Front Plant Sci. 2018 Nov 20;9:1619. doi: 10.3389/fpls.2018.01619 (PMC6256070; doi:10.3389/fpls.2018.01619)
Supplement: File S12 — Primers used in qRT-PCR validation of expression levels of genes. [file Table_11.XLSX]

## Sheet: Sheet1
ACAT1	ACAT1-F	agcataagtgatggtgccgc
	ACAT1-R	AGAGCCACAACCGAGAATGC
HMGS1	HMGS1-F	ggcaatactgacattgaagg
	HMGS1-R	AGCATCTGGTCCTATGAGCA
HMGR2	HMGR2-F	ccattgtctccctcatcgcc
	HMGR2-R	TGAGGGATTCAGAATCGGAC
MVK1	MVK1-F	tgcatggatctacggctgtt
	MVK1-R	GGTGTTGACAAAGGTAGACC
PMK	PMK-F	actgaggaagccaatggagga
	PMK-R	AGTGAGCAGTTTGAGCTATC
MVD	MVD-F	ggatgaaaccctaatcttgc
	MVD-R	CCTTATTCTCAACATCACAG
MCT1	MCT1-F	cggtttgtgatccttcatat
	MCT1-R	ATGTCTCCAAATGAAACGAG
CMK	CMK-F	accaaggaccgtttgtcaac
	CMK-R	TTGCAGGACAACCACTGAAC
MDS	MDS-F	tctaccctctctgcctcttc
	MDS-R	GAGACTGTAGACGCACCGAT
HDS	HDS-F	ggatgttgctgcaacagttg
	HDS-R	GAGCAAAGTGAATGTCAGCC
HDR2	HDR2-F	catcttcctactactcgctc
	HDR2-R	GTGTCTCTTCCTTGTATCCA
IDI1	IDI1-F	gcacattctcttctgtcaag
	IDI1-R	CACTGAAAGCTCTATGCAGC
GGPS1	GGPS1-F	ctggagaaggcaagttcagt
	GGPS1-R	ATCATCTCAACAGCGCAAGC
Actin2	Actin2-F	catgaagtgtgatgtggata
	Actin2-R	CCTTGCTCATTCTATCAGCA
HMGR1	HMGR1-F	tcatcgcctccgtcatctac
	HMGR1-R	ATGATGCCTGCTGGGCATGG
STPS1	STPS1-F	accttcgagaaagagcagat
	STPS1-R	TTGTACCACTCTGATAGGTG
STPS2	STPS2-F	tgcttgttccagccactgac
	STPS2-R	GGTATCCTTGCTGCCTCAAT
DTPS1	DTPS1-F	ctgggcagtcttcagaagca
	DTPS1-R	CGATTCGAGGCAGTATCCCA
DTPS2	DTPS2-F	aatccaagtctgtcccaacg
	DTPS2-R	CGCATTCAATTTGCCTTCCTC
DXR1	DXR1-F	ctgatatgcgcttgccaatc
	DXR1-R	TGCTGACTCCTGTCATAGTG
DXS2	DXS2-F	accaacggctacccttgatg
	DXS2-R	TCAAAGAGGGTAGATCCCTC
GPS1	GPS1-F	catatagccaacaggctgcg
	GPS1-R	TTGGGAGCAGGTGGTTCAGG
FPS1	FPS1-F	tgttaatggcggatctgaag
	FPS1-R	TCGTCATCACTCAATTCCTGC
WRKY	WRKY-F	gaggtcagatgatgggtaca
	WRKY-R	TGCTTGAGGCTTGGGATGGT
ARF	ARF-F	ggctactaatactcctgcaa
	ARF-R	ACATCCATGTGGAGGGTCAC
IDI1	IDI1-F	gcacattctcttctgtcaag
	IDI1-R	CACTGAAAGCTCTATGCAGC
DTPS3	DTPS3-F	cagacactggcttcatggcg
	DTPS3-R	CTTGTAACGATCTGCGAAGCT
DTPS4	DTPS4-F	cgtctgttacgtctcaatgga
	DTPS4-R	CAAGAGATGACCTGTCCAGT
